# Supplementary material for: Solid-phase esterification between poly(vinyl alcohol) and malonic acid and its function in toughening hydrogels
Source: Royal Society of Chemistry journal article supplement (doi:10.1039/d0py00023j), 2020-01-01
Supplement: d0py00023j1.pdf [file d0py00023j1.pdf]

## Electronic Supplementary Information

### Solid-phase esterification between poly(vinyl alcohol) and malonic acid and its function in toughening hydrogels

Tianqi Liu, Xin Peng, Yuanyuan Chen, Jianan Zhang, Chen Jiao and Huiliang Wang\*

*Beijing Key Laboratory of Energy Conversion and Storage Materials, College of Chemistry,*

*Beijing Normal University, Beijing 100875, P. R. China.*

\*E-mail: wanghl@bnu.edu.cn

## Supplementary Figures

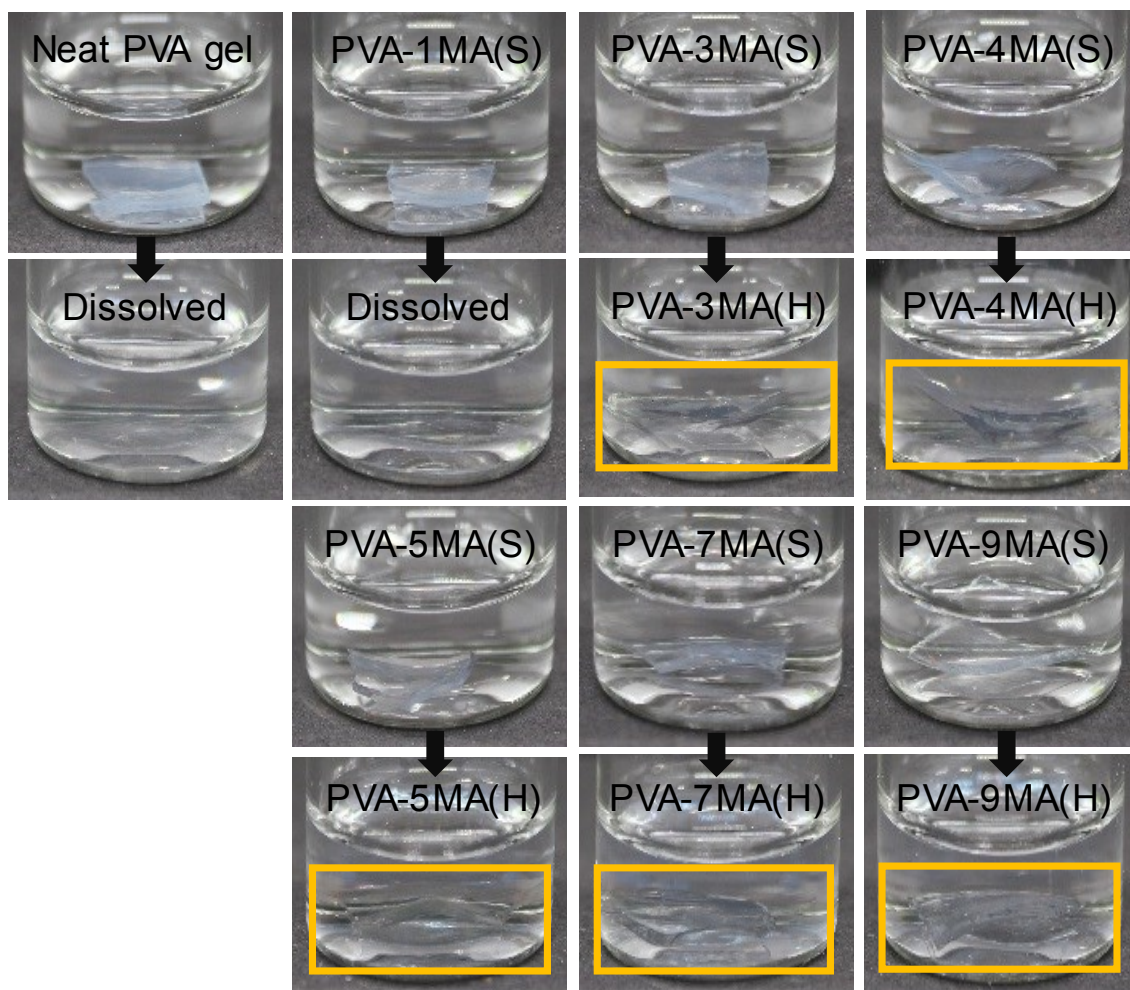

**Fig. S1** Photographs showing the state of the PVA-xMA(S) hydrogels with varying MA content after being heated in deionized water at 95 °C for more than 20 h.

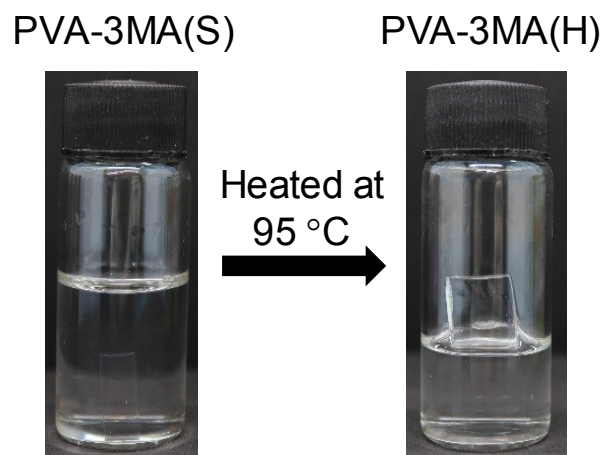

**Fig. S2** Photographs showing the state of the PVA-3MA(S) hydrogel after being heated in a 5 mol L<sup>-1</sup> NaSCN aqueous solution at 95 °C for more than 20 h.

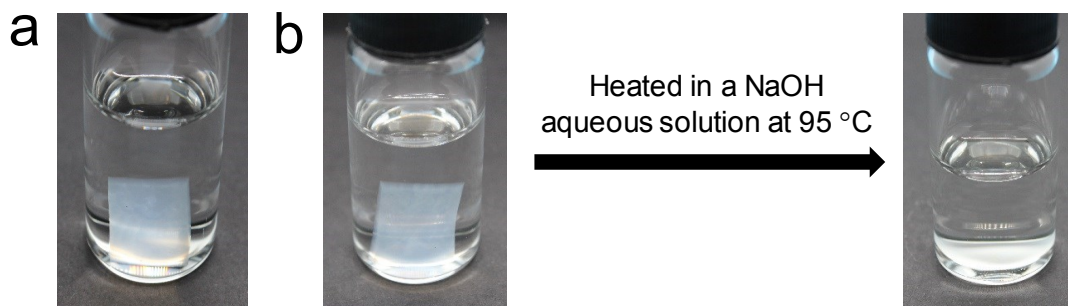

**Fig. S3** (a) A photograph of the AP-PVA-7MA hydrogel in deionized water. (b) Photographs showing the state the PVA-7MA(S) hydrogel in deionized water and the PVA-7MA(S) hydrogel after being heated in a 0.2 mol L<sup>-1</sup> NaOH aqueous solution at 95 °C.

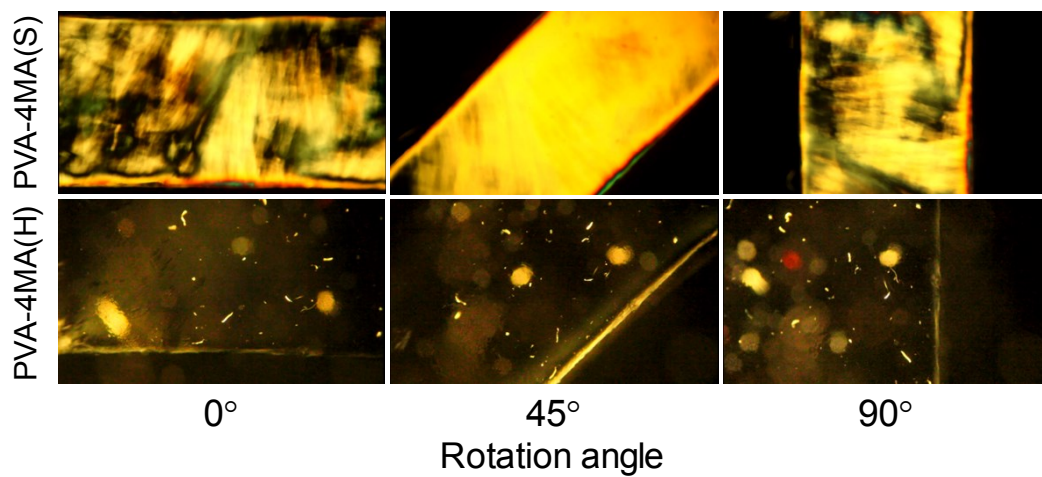

**Fig. S4** Polarized optical microscopic (POM) images of the PVA-4MA(S) and PVA-4MA(H) hydrogels at the rotation angle of 0, 45, and 90°.

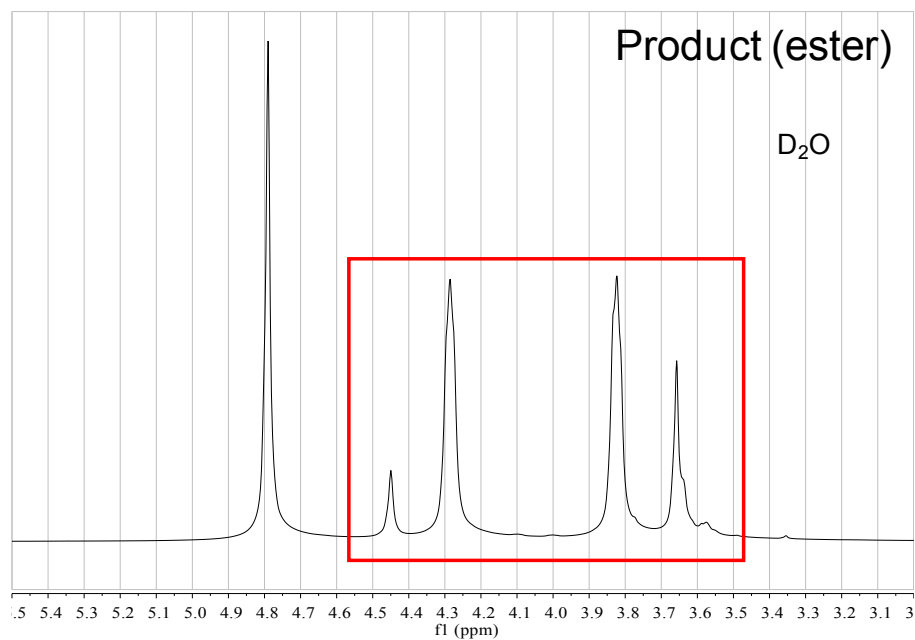

**Fig. S5**  $^1\text{H}$ -NMR spectrum of the separated esterification products between MA and ethylene glycol in  $\text{D}_2\text{O}$  at 298 K (400 MHz).

## Supplementary Tables

**Table S1** Water contents of the PVA-xMA(S) and PVA-xMA(H) hydrogels.

| Hydrogel Code | H <sub>2</sub> O (wt%) |
|---------------|------------------------|
| PVA-0MA(S)    | 61.6 ± 0.2             |
| PVA-1MA(S)    | 62.6 ± 0.4             |
| PVA-3MA(S)    | 53.4 ± 0.7             |
| PVA-4MA(S)    | 50.3 ± 0.3             |
| PVA-5MA(S)    | 43.0 ± 0.6             |
| PVA-7MA(S)    | 36.0 ± 0.7             |
| PVA-9MA(S)    | 35.2 ± 0.4             |
| PVA-3MA(H)    | 80.8 ± 0.3             |
| PVA-4MA(H)    | 74.8 ± 1.1             |
| PVA-5MA(H)    | 70.6 ± 0.5             |
| PVA-7MA(H)    | 63.7 ± 0.4             |
| PVA-9MA(H)    | 56.6 ± 1.2             |

**Table S2** Values of the cross-linking density ( $\nu_e$ ) of the PVA-xMA(H) hydrogels at the temperature of 298 K.

| Sample     | $\nu_e$ (mol m <sup>-3</sup> ) |                       |                         |
|------------|--------------------------------|-----------------------|-------------------------|
|            | 0.01 rad s <sup>-1</sup>       | 1 rad s <sup>-1</sup> | 100 rad s <sup>-1</sup> |
| PVA-4MA(H) | 172                            | 183                   | 190                     |
| PVA-5MA(H) | 293                            | 315                   | 337                     |
| PVA-7MA(H) | 338                            | 359                   | 416                     |
| PVA-9MA(H) | 396                            | 484                   | 517                     |



## **Supplementary Movies**

**Movie S1** A movie showing the PVA-4MA(S) hydrogel observed by POM at different rotation angles.

**Movie S2** A movie showing the PVA-4MA(H) hydrogel observed by POM at different rotation angles.

**Movie S3** A movie showing the load-bearing ability of the healed PVA-7MA(S) hydrogel.

**Movie S4** A movie showing the tensile mechanical test of the healed PVA-7MA(S) hydrogel.
